# Supplementary material for: Association of Socioeconomic Position With e-Cigarette Use Among Individuals Who Quit Smoking in England, 2014 to 2019
Source: PubMed Central journal article supplement (PMC7275246; doi:10.1001/jamanetworkopen.2020.4207), 2020-06-05
Supplement: jamanetwopen-3-e204207-s001.pdf [file jamanetwopen-3-e204207-s001.pdf]

## Supplementary Online Content

Kock L, Brown J, Shahab L. Association of socioeconomic position with e-cigarette use among individuals who quit smoking in England, 2014 to 2019. *JAMA Netw Open*. 2020;3(6):e204207. doi:10.1001/jamanetworkopen.2020.4207

**eTable 1.** Associations Between Nicotine Replacement Therapy, Year, and Socioeconomic Position

**eTable 2.** Associations Between e-Cigarette Use and Year of Survey and SEP (Housing Tenure) in England, 2014 to 2019

**eTable 3.** Associations Between e-Cigarette Use and SEP (Housing Tenure) Stratified by Year in England, 2014-2019

**eFigure 1.** EC and NRT Use Among Those Who Quit Smoking for More Than 1 Year as a Percentage of Respective Use in the General Population

**eFigure 2.** EC Use Among Those Who Quit Smoking in the Past Year and Did not Use ECs in Quit Attempt as a Percentage of Respective Use in the General Population

**eFigure 3.** Current e-Cigarette Use Among Those Who Quit Smoking Before 2011 as a Percentage of Use in the General Population

This supplementary material has been provided by the authors to give readers additional information about their work.

## Appendix

**eTable 1.** Associations Between Nicotine Replacement Therapy, Year, and Socioeconomic Position

**eTable 1a.** Associations between NRT use and year of survey and SEP among i) long-term ex-smokers and past-year ex-smokers (2014-2019).

|                          | Long term ex-smokers <sup>a</sup><br>(N=19842) | <i>P</i> | PY ex-smokers <sup>b</sup><br>(N=870) | <i>P</i> |
|--------------------------|------------------------------------------------|----------|---------------------------------------|----------|
| <b>SEP</b>               |                                                |          |                                       |          |
| ABC1                     | 1 [reference]                                  |          | 1 [reference]                         |          |
| C2DE                     | 1.20 (0.81–1.79)                               | .36      | 2.87 (0.81-13.46)                     | .13      |
| <b>Year</b>              |                                                |          |                                       |          |
| 2014 ref                 | 1 [reference]                                  |          | 1 [reference]                         |          |
| 2015                     | 0.77 (0.52-1.14)                               | .19      | 0.54 (0.07-3.38)                      | .48      |
| 2016                     | 0.90 (0.62-1.30)                               | .55      | 1.22 (0.22-6.90)                      | .86      |
| 2017                     | 0.98 (0.69-1.41)                               | .92      | 1.22 (1.26-6.43)                      | .83      |
| 2018                     | 0.91 (0.63-1.31)                               | .60      | 1.45 (0.31-7.63)                      | .66      |
| 2019                     | 0.87 (0.58-1.29)                               | .43      | 2.52 (0.63-12.43)                     | .19      |
| <b>Interaction terms</b> |                                                |          |                                       |          |
| 2015*C2DE                | 1.39 (0.80-2.43)                               | .25      | 0.94 (0.10-9.70)                      | .97      |
| 2016*C2DE                | 0.97 (0.55-1.70)                               | .92      | 0.09 (0.01-1.10)                      | .09      |
| 2017*C2DE                | 0.89 (0.51-1.55)                               | .68      | 0.30 (0.03-2.21)                      | .26      |
| 2018*C2DE                | 0.76 (0.43-1.36)                               | .36      | 0.20 (0.02-1.63)                      | .15      |
| 2019*C2DE                | 0.73 (0.37-1.40)                               | .46      | 1.50 (0.06-3.18)                      | .49      |

Ns are not weighted. All models are adjusted for age, sex and region. Results for prevalence of e-cigarette use are presented as Odds Ratios (95% CI) against the indicated referent.  $p < 0.005$   $p$  values are indicated in bold. \* $p < 0.01$ , \*\* $p < 0.001$ . <sup>a</sup>Long-term (>1-year) ex-smokers; <sup>b</sup>Past year ex-smokers who did not use an NRT in their most recent quit attempt

SEP = Socio-economic position; ABC1 = higher SEP (higher and intermediate managerial, administrative and professional, supervisory occupations, clerical and junior managerial occupations); C2DE = lower SEP (semi-skilled and unskilled manual workers, state pensioners, casual and lowest grade workers, unemployed with state benefits only)

**Table 1b:** Associations between NRT use and SEP stratified by year among i) long-term ex-smokers and ii) past-year ex-smokers in England (2014-2019).

| Year                                    | 2014                     | <i>P</i>   | 2015                     | <i>P</i>   | 2016                 | <i>P</i>   | 2017             | <i>P</i>   | 2018                    | <i>P</i>   | 2019                 | <i>P</i>   |
|-----------------------------------------|--------------------------|------------|--------------------------|------------|----------------------|------------|------------------|------------|-------------------------|------------|----------------------|------------|
| <b>Long term ex-smokers<sup>a</sup></b> | (N=3170)                 |            | (N=3462)                 |            | (N=3533)             |            | (N=3617)         |            | (N=3532)                |            | (N=2528)             |            |
| <b>SEP</b>                              |                          |            |                          |            |                      |            |                  |            |                         |            |                      |            |
| ABC1 (N=12008)                          | 1<br>[reference]         |            | 1<br>[reference]         |            | 1 [reference]        |            | 1 [reference]    |            | 1<br>[reference]        |            | 1 [reference]        |            |
| C2DE (N=7834)                           | 1.12 0.74-<br>1.66)      | <b>.59</b> | 1.66<br>(1.11-<br>2.48)  | <b>.02</b> | 1.22 (0.81-<br>1.84) | <b>.33</b> | 1.05 (0.71-1.55) | <b>.80</b> | 0.89<br>(0.57-<br>1.36) | <b>.59</b> | 0.85 (0.49-<br>1.45) | <b>.60</b> |
| <b>PY-ex-smokers<sup>b</sup></b>        | (N=194)                  |            | (N=158)                  |            | (N=129)              |            | (N=152)          |            | (N=152)                 |            | (N=85)               |            |
| <b>SEP</b>                              |                          |            |                          |            |                      |            |                  |            |                         |            |                      |            |
| ABC1 (N=479)                            | 1<br>[reference]         |            | 1<br>[reference]         |            | 1 [reference]        |            | 1 [reference]    |            | 1<br>[reference]        |            | 1 [reference]        |            |
| C2DE(N=391)                             | 3.04<br>(0.85-<br>14.34) | <b>.11</b> | 3.16<br>(0.58-<br>23.74) | <b>.20</b> | 0.27 (0.01-<br>2.23) | <b>.27</b> | 1.10 (0.21-5.29) | <b>.90</b> | 0.45<br>(0.06-<br>2.50) | <b>.38</b> | 1.26 (0.30-<br>4.79) | <b>.61</b> |

Ns are not weighted. All models are adjusted for age, sex and region. Results for prevalence of e-cigarette use are presented as Odds Ratios (95% CI) against the indicated referent.  $p < 0.005$  p values are indicated in bold. \* $p < 0.01$ , \*\* $p < 0.001$ .

<sup>a</sup>Long-term (>1-year) ex-smokers. <sup>b</sup>Past year ex-smokers who did not use an e-cigarette in their most recent quit attempt.

SEP = Socio-economic position; ABC1 = higher SEP (higher and intermediate managerial, administrative and professional, supervisory occupations, clerical and junior managerial occupations); C2DE = lower SEP (semi-skilled and unskilled manual workers, state pensioners, casual and lowest grade workers, unemployed with state benefits only)

**eTable 2.** Associations Between e-Cigarette Use and Year of Survey and SEP (housing tenure) in England, 2014 to 2019

|                          | Long term ex-smokers    | P     | PY ex-smokers <sup>b</sup> | P   | Pre-2011 LT ex-smokers <sup>c</sup> | P     |
|--------------------------|-------------------------|-------|----------------------------|-----|-------------------------------------|-------|
|                          | (N=19842)               |       | (N=870)                    |     | (N=15063)                           |       |
| <b>SEP</b>               |                         |       |                            |     |                                     |       |
| Other                    | 1 [reference]           |       | 1 [reference]              |     | 1 [reference]                       |       |
| Social housing           | 2.25 (1.39-3.55)        | <.001 | 1.89 (0.55- 5.79)          | .28 | 1.21 (0.28 - 3.73)                  | .77   |
| <b>Year</b>              |                         |       |                            |     |                                     |       |
| 2014 ref                 | 1 [reference]           | .01   | 1 [reference]              |     | 1 [reference]                       |       |
| 2015                     | 1.46 (1.08-2.00)        | <.001 | 1.15 (0.44-2.93)           | .79 | 0.54 (0.23 - 1.22)                  | .15   |
| 2016                     | 2.37 (1.79-3.17)        | <.001 | 1.37 (0.52-3.51)           | .55 | 1.62 (0.85 - 3.17)                  | .15   |
| 2017                     | 2.99 (2.27-3.97)        | <.001 | 0.43 (0.11-1.30)           | .15 | 1.51 (0.78 - 3.01)                  | .23   |
| 2018                     | 3.25 (2.47-4.32)        | <.001 | 1.16 (0.44-2.96)           | .76 | 2.01 (1.07-3.90)                    | .03   |
| 2019                     | 3.54 (2.67-4.75)        | <.001 | 0.39 (0.06-1.54)           | .42 | 3.27 (1.76 - 6.35)                  | <.001 |
| <b>Interaction terms</b> |                         |       |                            |     |                                     |       |
| 2015*C2DE                | 0.90 (0.50-1.66)        | .74   | 1.18 (0.20-6.72)           | .88 | 2.48 (0.44-15.38)                   | .30   |
| 2016*C2DE                | 0.57 (0.31-1.05)        | .07   | 0.19 (0.01-1.66)           | .19 | 0.51 (0.06-3.50)                    | .51   |
| 2017*C2DE                | <b>0.55 (0.31-0.98)</b> | .04   | 1.85 (0.25-13.31)          | .53 | 1.67 (0.39-8.87)                    | .50   |
| 2018*C2DE                | 0.66 (0.54-1.40)        | .14   | 0.21 (0.01-1.88)           | .21 | 1.17 (0.26-6.26)                    | .83   |
| 2019*C2DE                | 0.79 (0.45-1.43)        | .46   | 1.19 (0.04-18.01)          | .65 | 0.92 (0.17-5.28)                    | .95   |

Ns are not weighted. All models are adjusted for age, sex and region. Results for prevalence of e-cigarette use are presented as Odds Ratios (95% CI) against the indicated referent. p<0.005 p values are indicated in bold. \*p<0.01, \*\*p<0.001.

<sup>a</sup>Long-term (>1-year) ex-smokers. <sup>b</sup>Past year ex-smokers who did not use an e-cigarette in their most recent quit attempt; <sup>c</sup>Long-term ex-smokers who quit smoking before 2011.

SEP = Socio-economic position; Other = higher SEP (mortgage bought, owned outright, private renting and other); Social housing = lower SEP ((local authority or housing association)

**eTable 3.** Associations Between e-Cigarette Use and SEP (Housing Tenure) Stratified by Year in England, 2014-2019

| Year                                      | 2014             | <i>P</i>        | 2015               | <i>P</i>        | 2016               | <i>P</i> | 2017               | <i>P</i> | 2018               | <i>P</i> | 2019                | <i>P</i>        |
|-------------------------------------------|------------------|-----------------|--------------------|-----------------|--------------------|----------|--------------------|----------|--------------------|----------|---------------------|-----------------|
| <b>Long term ex-smokers<sup>a</sup></b>   | (N=3170)         |                 | (N=3462)           |                 | (N=3533)           |          | (N=3617)           |          | (N=3532)           |          | (N=2528)            |                 |
| <b>SEP</b>                                |                  |                 |                    |                 |                    |          |                    |          |                    |          |                     |                 |
| Other (N=12008)                           | 1 [reference]    |                 | 1 [reference]      |                 | 1 [reference]      |          | 1 [reference]      |          | 1 [reference]      |          | 1 [reference]       |                 |
| Social housing (N=7834)                   | 2.31 (1.41-3.68) | <b>&lt;.001</b> | 1.99 (1.34-2.93)   | <b>&lt;.001</b> | 1.27 (0.84-1.85)   | .24      | 1.24 (0.88 - 1.71) | .21      | 1.46 (1.06 - 2.00) | .02      | 1.84 (1.28 - 2.59)  | <b>&lt;.001</b> |
| <b>PY-ex-smokers<sup>b</sup></b>          | (N=194)          |                 | (N=158)            |                 | (N=129)            |          | (N=152)            |          | (N=152)            |          | (N=85)              |                 |
| <b>SEP</b>                                |                  |                 |                    |                 |                    |          |                    |          |                    |          |                     |                 |
| Other (N=479)                             | 1 [reference]    |                 | 1 [reference]      |                 | 1 [reference]      |          | 1 [reference]      |          | 1 [reference]      |          | 1 [reference]       |                 |
| Social housing (N=391)                    | 1.87 (0.55-5.68) | .30             | (0.54-7.65)        | .23             | (0.02-2.05)        | .33      | (0.54-16.28)       | .18      | 0.79 (0.04 - 5.24) | .84      | 3.07 (0.13 - 37.83) | .87             |
| <b>Pre-2011 LT ex-smokers<sup>c</sup></b> | (N=2683)         |                 | (N=2805)           |                 | (N=2703)           |          | (N=2649)           |          | (N=2501)           |          | (N=1722)            |                 |
| <b>SEP</b>                                |                  |                 |                    |                 |                    |          |                    |          |                    |          |                     |                 |
| Other (N=13105)                           | 1 [reference]    |                 | 1 [reference]      |                 | 1 [reference]      |          | 1 [reference]      |          | 1 [reference]      |          | 1 [reference]       |                 |
| Social housing (N=1958)                   | 1.11 (0.25-3.42) | .87             | 2.76 (0.73 - 8.67) | .10             | 0.58 (0.09 - 1.98) | .47      | 1.84 (0.71 - 4.24) | .20      | 1.64 (0.60-3.77)   | .28      | 1.16 (0.34-3.04)    | .72             |

Ns are not weighted. All models are adjusted for age, sex and region. Results for prevalence of e-cigarette use are presented as Odds Ratios (95% CI) against the indicated referent.  $p < 0.005$   $p$  values are indicated in bold. \* $p < 0.01$ , \*\* $p < 0.001$ .

<sup>a</sup>Long-term (>1-year) ex-smokers. <sup>b</sup>Past year ex-smokers who did not use an e-cigarette in their most recent quit attempt; <sup>c</sup>Long-term ex-smokers who quit smoking before 2011.

SEP = Socio-economic position; Other = higher SEP (mortgage bought, owned outright, private renting and other); Social housing = lower SEP ((local authority or housing association

**eFigure 1. EC and NRT Use Among Those Who Quit Smoking for More Than 1 Year as a Percentage of Respective Use in the General Population**

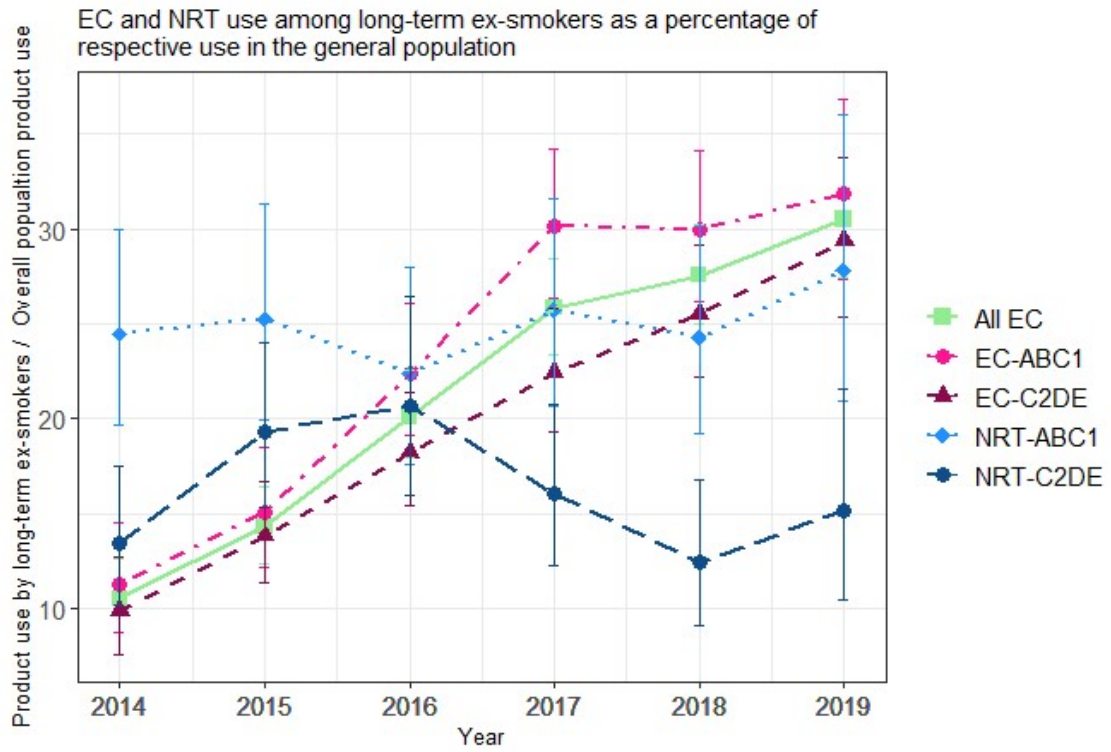

Ns are weighted

**eFigure 2. EC Use Among Those Who Quit Smoking in the Past Year and Did not Use ECs in Quit Attempt as a Percentage of Respective Use in the General Population**

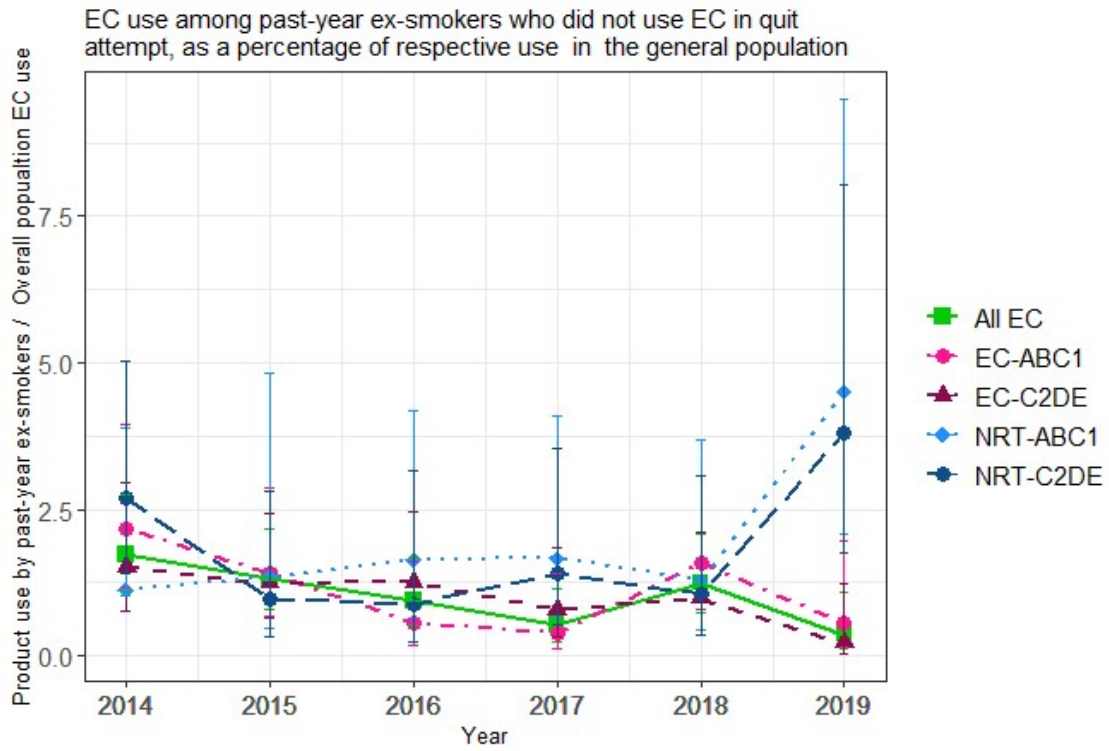

Ns are weighted

### eFigure 3. Current e-Cigarette Use Among Those Who Quit Smoking Before 2011 as a Percentage of Use in the General Population

Current e-cigarette use among pre-2011 long-term ex-smokers as a percentage of use in the general population

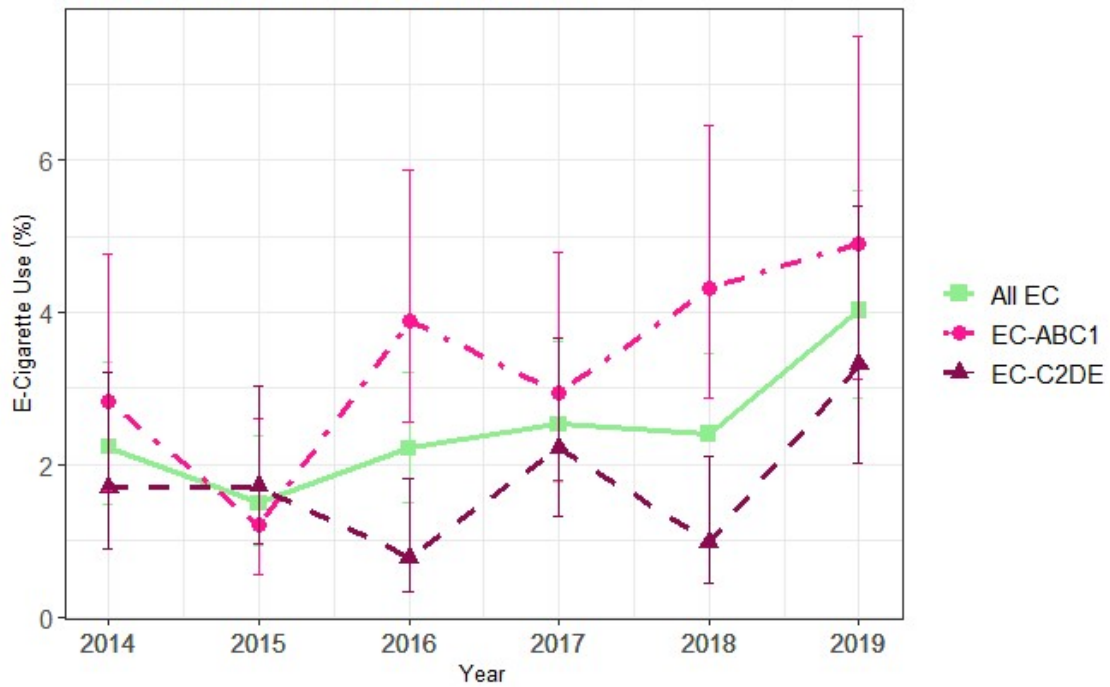

Ns are weighted
